# Supplementary material
Source: PubMed Central journal article supplement (PMC4433854)
Supplement: NIHMS676022-supplement-1.pdf [file NIHMS676022-supplement-1.pdf]

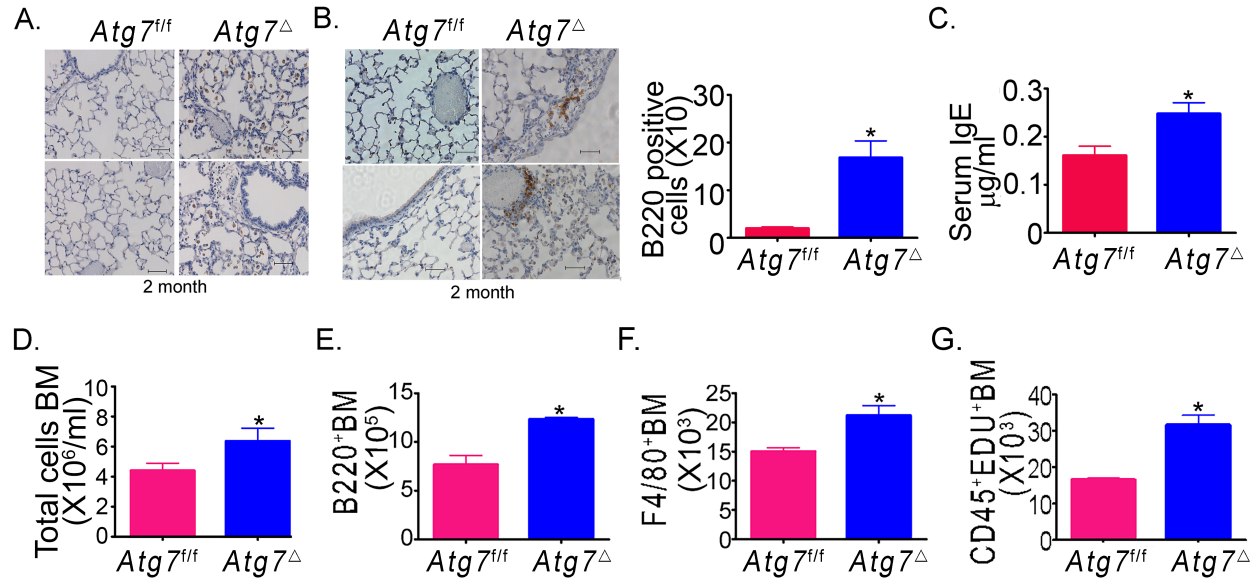

**Fig. S1. Lung inflammation and hypercellularity of bone marrow in *Atg7<sup>Δ</sup>* mice.** Lung tissues from *Atg7<sup>fl/fl</sup>* or *Atg7<sup>Δ</sup>* mice were immunostained with F4/80 macrophage marker (A) or B lymphocyte marker B220 (B) IgE serum levels were determined (C). Bone marrow (BM) (D-G) from *Atg7<sup>Δ</sup>* or control *Atg7<sup>fl/fl</sup>* mice were analyzed for cell counts. Flow cytometry quantifications of BM cells stained with B220 antibody (E), F4/80 antibody (F) or incorporating 5-ethynyl-2'-deoxyuridine (EDU) (G) are shown. Data are presented as mean  $\pm$  SEM of 3-10 mice/genotype. \* $p < 0.05$ . Scale bars, 200  $\mu$ m (A) and 50  $\mu$ m (D-E).

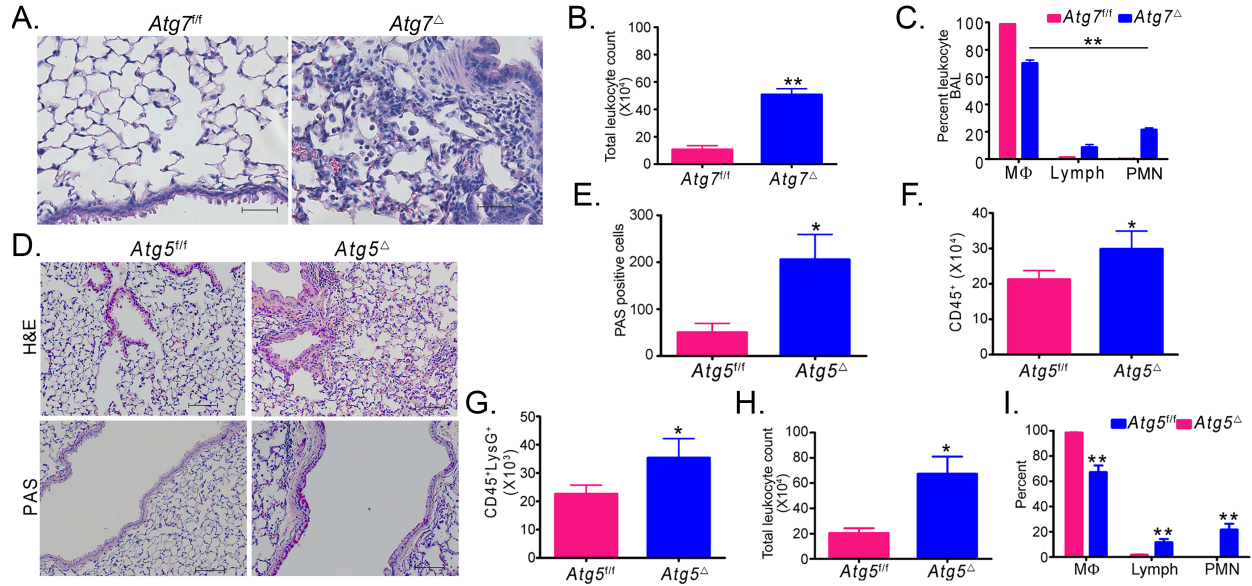

**Fig. S2. Lung inflammation in re-derived *Atg7<sup>Δ</sup>* and in *Atg5<sup>Δ</sup>* mice.** Lung tissues from *Atg7<sup>Δ</sup>* or control *Atg7<sup>fl/fl</sup>* mice were analyzed by H&E staining (A). BAL was analyzed for total cell count (B) and differential cell count (C). (D-E) Lung tissues from *Atg5<sup>fl/fl</sup>* or *Atg5<sup>Δ</sup>* mice were analyzed by H&E staining (upper panels) or PAS (lower panel). Graph represents quantitation of PAS positive cells (E). (F-G) Flow cytometry analysis of single cell suspensions of the lungs, immunostained with the pan leukocytic marker anti-CD45 (F) or anti-Ly6G (G). (H-I) BAL was analyzed for total cell count (H) and differential cell count (I). MΦ: macrophages, Lymph: lymphocytes and PMN: polymorphonuclear neutrophils PAS: periodic acid Schiff. Data are mean ± SEM n=5 to 8 mice/genotype. \*p<0.05, \*\*p<0.01. Scale bar, 50 μm (A), 100μm (D).

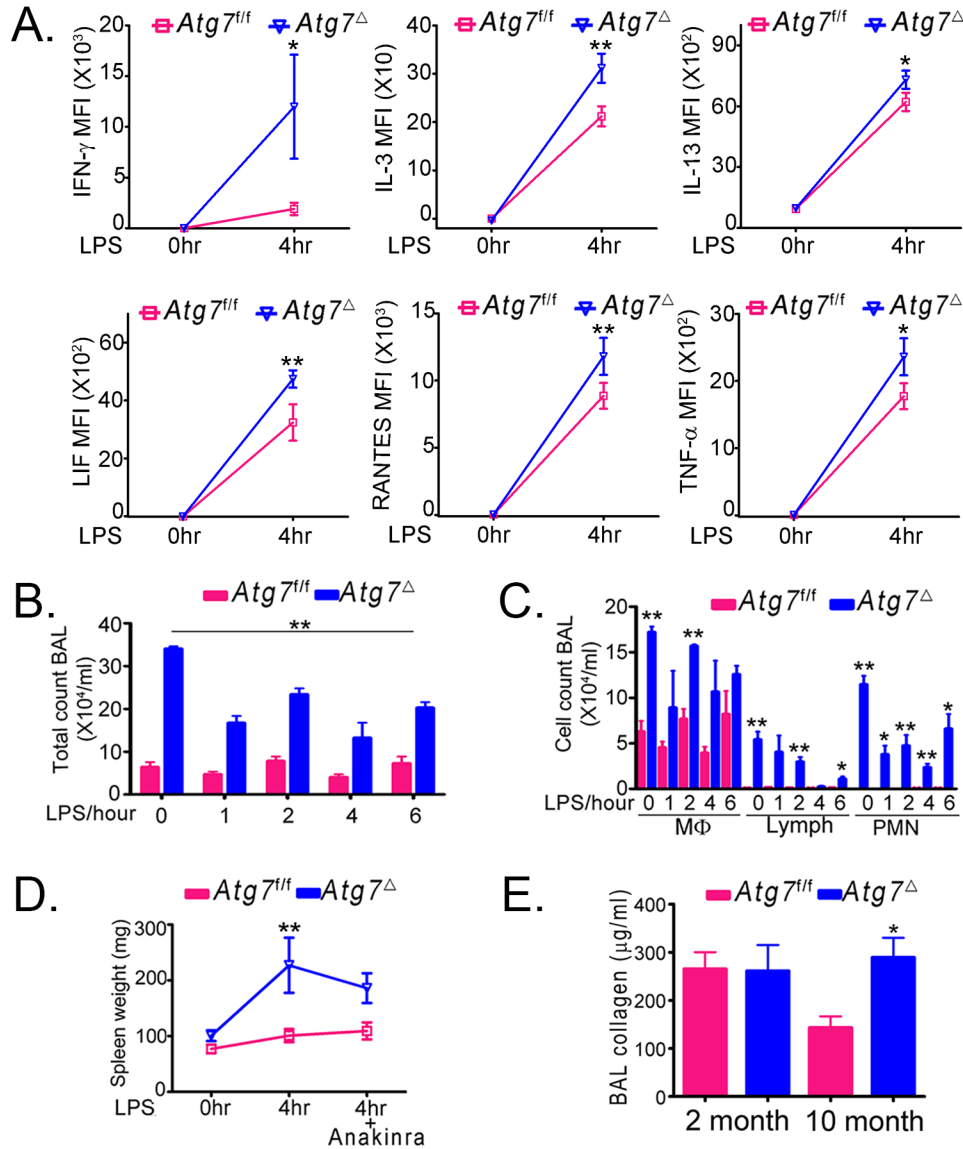

**Fig. S3. Systemic and pulmonary susceptibility of *Atg7 $\Delta$*  mice to endotoxin.** *Atg7<sup>fl/fl</sup>* or *Atg7 $\Delta$*  mice were injected intraperitoneally with LPS. Four hours after LPS injection, serum was collected and multiplex cytokine assay analysis was performed (A). BAL was analyzed at different time points after intraperitoneal LPS injection. Quantitative analyses of total leukocyte count (B) and differential cell count (C) are shown. Mice were treated for 4 hours with LPS with or without Anakinra, sacrificed and their spleens were weighed (D). BAL levels of soluble collagen from two and ten month old, naive *Atg7<sup>fl/fl</sup>* or *Atg7 $\Delta$*  mice were measured (E). MΦ: macrophages, Lymph: lymphocytes and PMN: polymorphonuclear neutrophils. Data are mean  $\pm$  SEM, n= 3-14 mice/genotype. \*p<0.05, \*\*p<0.01.

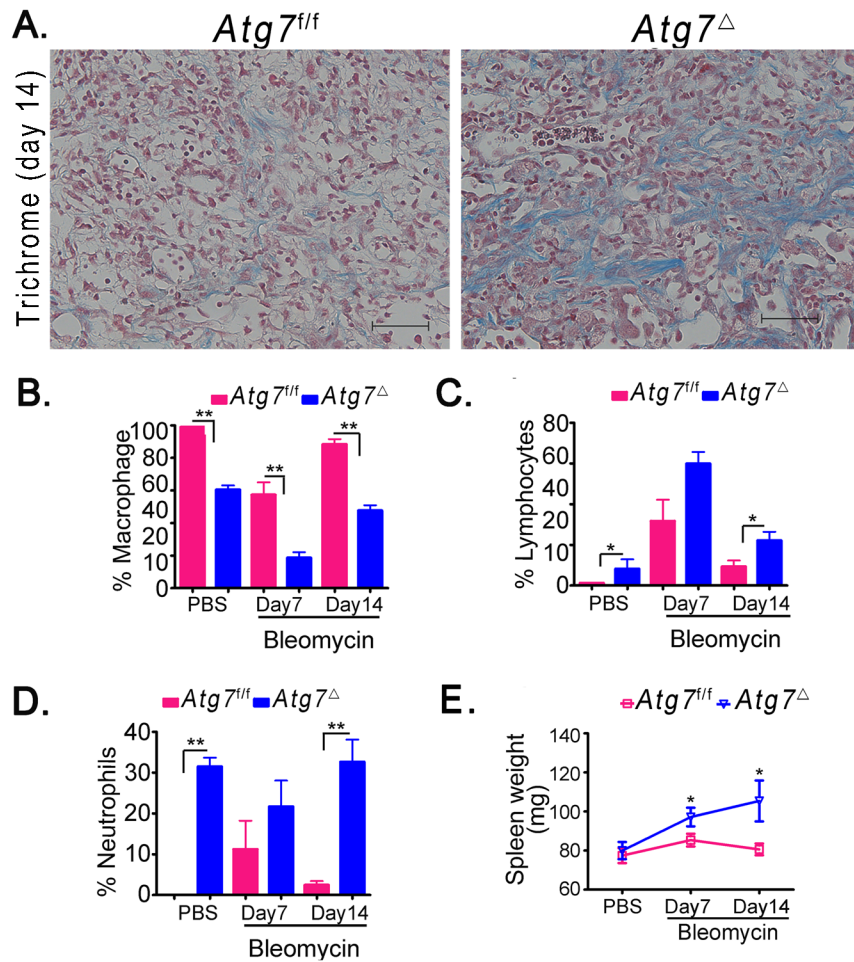

**Fig. S4. *Atg7<sup>Δ</sup>* mice exhibit increased susceptibility to bleomycin.** *Atg7<sup>fl/fl</sup>* or *Atg7<sup>Δ</sup>* mice were intranasally instilled with PBS or bleomycin for 7 or 14 days. Collagen deposition in lung tissues of 2-6 months old mice was evaluated by trichrome staining (**A**). BAL differential counts of macrophages (**B**) lymphocytes (**C**) and neutrophils (**D**) were determined. Spleen weights were recorded (**E**). Data are shown as mean  $\pm$  SEM,  $n=5$  to 17 mice/genotype for each time point. \* $p<0.05$ , \*\* $p<0.01$ . Scale bar, 50  $\mu\text{m}$ .
